# Supplementary material
Source: PubMed Central journal article supplement (PMC10668358)
Supplement: jexbio-223-227801-s1.pdf [file jexbio-223-227801-s1.pdf]

**Table S1.** Summary of estimated acute thermal tolerance and assay temperatures that induce declines in mitochondrial parameters predicted to limit thermal tolerance.

| Species (tissue, acclimation temperature) and habitat climate                                     | Estimated acute upper thermal tolerance limit (Assay type)                                 | Mitochondrial parameter                             |                                                                               |                                                  |                                                   |                                                             |
|---------------------------------------------------------------------------------------------------|--------------------------------------------------------------------------------------------|-----------------------------------------------------|-------------------------------------------------------------------------------|--------------------------------------------------|---------------------------------------------------|-------------------------------------------------------------|
|                                                                                                   |                                                                                            | State III (Break point, or Max T <sub>assay</sub> ) | Coupling ratio (RCR, ACR or P/O) (T <sub>Decline</sub> )                      | Mito. membrane potential (T <sub>Decline</sub> ) | ATP synthesizing capacity (T <sub>Decline</sub> ) | ROS production (Respiratory state) (T <sub>Increase</sub> ) |
| <i>Alvinella pompejana</i> (Gill, wild-caught) Hydrothermal vent Dahlhoff et al., 1991            | 55 °C (T <sub>lethal</sub> , wild-caught) Ravaux et al., 2013                              | <b>48.6 °C</b> (ABT-CII)                            | NM                                                                            | NM                                               | NM                                                | NM                                                          |
| <i>Boreogadus saida</i> (Heart fibre, 5 °C) Polar Leo et al., 2017                                | 15.7 °C (CT <sub>max</sub> , T <sub>acclimation</sub> = 3.5 °C) Drost et al., 2016         | <b>3 °C</b> (plateau-CI, CII)                       | <b>6 °C</b> (coupling efficiency-CI, CII) <sup>see</sup> Gnaiger et al., 2015 | NM                                               | NM                                                | NM                                                          |
| <i>Bythograea thermydon</i> (Hepatopancreas, wild-caught) Hydrothermal vent Dahlhoff et al., 1991 | 37.5 °C (T <sub>lethal</sub> , wild-caught = 5 °C) Childress et al., 1982                  | <b>46.3 °C</b> (ABT-CII)                            | NM                                                                            | NM                                               | NM                                                | NM                                                          |
| <i>Chaenocephalus aceratus</i> (Heart mito., 0 °C) Polar Urschel and O'Brien, 2009                | 13.9 °C (CT <sub>max</sub> , T <sub>acclimation</sub> = 0 °C) Beers and Sidell, 2011       | <b>28.7 °C</b> (ABT-CI)                             | <b>26 °C</b> (RCR-CI)                                                         | NM                                               | NM                                                | NM                                                          |
| <i>Chionodraco rastrospinosus</i> (Heart, mito., 0 °C) Polar Urschel and O'Brien, 2009            | 13.3 °C (CT <sub>max</sub> , T <sub>acclimation</sub> = 0 °C) Beers and Sidell, 2011       | <b>31.5 °C</b> (ABT-CI)                             | <b>26 °C</b> (RCR-CI)                                                         | NM                                               | NM                                                | NM                                                          |
| <i>Drosophila simulans</i> (Perm. whole animal, 24 °C) Tropical Pichaud et al., 2010              | 40.9 °C (T <sub>knockdown</sub> , T <sub>acclimation</sub> = 27 °C) Overgaard et al., 2011 | <b>24 °C</b> (decline)                              | <b>24 °C</b> (P/O)                                                            | NM                                               | NM                                                | NM                                                          |
| <i>Fundulus heteroclitus heteroclitus</i> (Heart fibre, 5 °C) Subtropical Chung et al., 2017      | 30.8 °C (CT <sub>max</sub> , T <sub>acclimation</sub> = 2.3 °C) Fanguie et al., 2006       | ND (37 °C)                                          | ND (RCR)                                                                      | NM                                               | NM                                                | NM                                                          |
| <i>Fundulus heteroclitus heteroclitus</i> (Heart fibre, 15 °C) Subtropical Chung et al., 2018     | 34.9 °C (CT <sub>max</sub> , T <sub>acclimation</sub> = 12.4 °C) Fanguie et al., 2006      | <b>33 °C</b> (plateau)                              | ND (RCR)                                                                      | NM                                               | NM                                                | NM                                                          |
| <i>Fundulus heteroclitus heteroclitus</i> (Heart fibre, 33 °C) Subtropical Chung et al., 2018     | 42.5 °C (CT <sub>max</sub> , T <sub>acclimation</sub> = 34 °C) Fanguie et al., 2006        | 33 °C (plateau)                                     | ND (RCR)                                                                      | NM                                               | NM                                                | NM                                                          |
| <i>Fundulus heteroclitus heteroclitus</i> (Liver mito., 5 °C) Subtropical Chung et al., 2018      | 30.8 °C (CT <sub>max</sub> , T <sub>acclimation</sub> = 2.3 °C) Fanguie et al., 2006       | 33 °C (plateau)                                     | 33 °C (RCR)                                                                   | NM                                               | NM                                                | NM                                                          |
| <i>Fundulus heteroclitus heteroclitus</i> (Liver mito., 15 °C) Subtropical Chung et al., 2018     | 34.9 °C (CT <sub>max</sub> , T <sub>acclimation</sub> = 12.4 °C) Fanguie et al., 2006      | ND (37 °C)                                          | <b>33 °C</b> (RCR)                                                            | NM                                               | NM                                                | NM                                                          |
| <i>Fundulus heteroclitus heteroclitus</i> (Liver mito., 25 °C) Subtropical Fanguie et al., 2009   | 41.4 °C (CT <sub>max</sub> , T <sub>acclimation</sub> = 26.5 °C) Fanguie et al., 2006      | 30 °C (plateau)                                     | 30 °C (RCR)                                                                   | NM                                               | NM                                                | NM                                                          |
| <i>Fundulus heteroclitus heteroclitus</i> (Liver mito., 33 °C) Subtropical Chung et al., 2018     | 42.5 °C (CT <sub>max</sub> , T <sub>acclimation</sub> = 34 °C) Fanguie et al., 2006        | 15 °C (plateau)                                     | 33 °C (RCR)                                                                   | NM                                               | NM                                                | NM                                                          |

|                                                                                                   |                                                                                         |                                |                                                                         |                                                 |    |                                                 |
|---------------------------------------------------------------------------------------------------|-----------------------------------------------------------------------------------------|--------------------------------|-------------------------------------------------------------------------|-------------------------------------------------|----|-------------------------------------------------|
| <i>Fundulus heteroclitus heteroclitus</i> (Perm. brain, 5 °C) Subtropical<br>Chung et al., 2017   | 30.8 °C (CT <sub>max</sub> , T <sub>acclimation</sub> = 2.3 °C)<br>Fangue et al., 2006  | 33 °C (plateau)                | ND (RCR)                                                                | NM                                              | NM | NM                                              |
| <i>Fundulus heteroclitus heteroclitus</i> (Perm. brain, 15 °C) Subtropical<br>Chung et al., 2017  | 34.9 °C (CT <sub>max</sub> , T <sub>acclimation</sub> = 12.4 °C)<br>Fangue et al., 2006 | <b>33 °C</b> (plateau)         | ND (RCR)                                                                | NM                                              | NM | NM                                              |
| <i>Fundulus heteroclitus heteroclitus</i> (Perm. brain, 33 °C) Subtropical<br>Chung et al., 2017  | 42.5 °C (CT <sub>max</sub> , T <sub>acclimation</sub> = 34 °C)<br>Fangue et al., 2006   | 33 °C (plateau)                | ND (RCR)                                                                | NM                                              | NM | NM                                              |
| <i>Fundulus heteroclitus macrolepidotus</i> (Heart fibre, 5 °C) Temperate<br>Chung et al., 2017   | 28.6 °C (CT <sub>max</sub> , T <sub>acclimation</sub> = 2.3 °C)<br>Fangue et al., 2006  | ND (37 °C)                     | ND (RCR)                                                                | NM                                              | NM | NM                                              |
| <i>Fundulus heteroclitus macrolepidotus</i> (Heart fibre, 15 °C) Temperate<br>Chung et al., 2018  | 33.6 °C (CT <sub>max</sub> , T <sub>acclimation</sub> = 12.4 °C)<br>Fangue et al., 2006 | <b>33 °C</b> (plateau)         | ND (RCR)                                                                | NM                                              | NM | NM                                              |
| <i>Fundulus heteroclitus macrolepidotus</i> (Heart fibre, 33 °C) Temperate<br>Chung et al., 2018  | 41.3 °C (CT <sub>max</sub> , T <sub>acclimation</sub> = 34 °C)<br>Fangue et al., 2006   | ND (37 °C)                     | ND (RCR)                                                                | NM                                              | NM | NM                                              |
| <i>Fundulus heteroclitus macrolepidotus</i> (Liver mito., 5 °C) Temperate<br>Chung et al., 2018   | 28.6 °C (CT <sub>max</sub> , T <sub>acclimation</sub> = 2.3 °C)<br>Fangue et al., 2006  | 33 °C (plateau)                | 33 °C (RCR)                                                             | 33 °C (State III-CI)<br>Chung and Schulte, 2015 | NM | 33 °C (State IV-CII)<br>Chung and Schulte, 2015 |
| <i>Fundulus heteroclitus macrolepidotus</i> (Liver mito., 15 °C) Temperate<br>Chung et al., 2018  | 33.6 °C (CT <sub>max</sub> , T <sub>acclimation</sub> = 12.4 °C)<br>Fangue et al., 2006 | <b>33 °C</b> (plateau)         | <b>33 °C</b> (RCR)                                                      | 33 °C (State III-CI)<br>Chung and Schulte, 2015 | NM | 33 °C (State IV-CII)<br>Chung and Schulte, 2015 |
| <i>Fundulus heteroclitus macrolepidotus</i> (Liver mito., 25 °C) Temperate<br>Fangue et al., 2009 | 40.4 °C (CT <sub>max</sub> , T <sub>acclimation</sub> = 26.5 °C)<br>Fangue et al., 2006 | 30 °C, (plateau)               | 35 °C (RCR)                                                             | NM                                              | NM | NM                                              |
| <i>Fundulus heteroclitus macrolepidotus</i> (Liver mito., 33 °C) Temperate<br>Chung et al., 2018  | 41.3 °C (CT <sub>max</sub> , T <sub>acclimation</sub> = 34 °C)<br>Fangue et al., 2006   | 33 °C (plateau)                | 33 °C (RCR)                                                             | 33 °C (State III-CI)<br>Chung and Schulte, 2015 | NM | 33 °C (State IV-CII)<br>Chung and Schulte, 2015 |
| <i>Fundulus heteroclitus macrolepidotus</i> (Perm. brain, 5 °C) Temperate<br>Chung et al., 2017   | 28.6 °C (CT <sub>max</sub> , T <sub>acclimation</sub> = 2.3 °C)<br>Fangue et al., 2006  | ND (37 °C)                     | ND (RCR)                                                                | NM                                              | NM | NM                                              |
| <i>Fundulus heteroclitus macrolepidotus</i> (Perm. brain, 15 °C) Temperate<br>Chung et al., 2017  | 33.6 °C (CT <sub>max</sub> , T <sub>acclimation</sub> = 12.4 °C)<br>Fangue et al., 2006 | <b>33 °C</b> (plateau)         | ND (RCR)                                                                | NM                                              | NM | NM                                              |
| <i>Fundulus heteroclitus macrolepidotus</i> (Perm. brain, 33 °C) Temperate<br>Chung et al., 2017  | 41.3 °C (CT <sub>max</sub> , T <sub>acclimation</sub> = 34 °C)<br>Fangue et al., 2006   | 33 °C (plateau)                | ND (RCR)                                                                | NM                                              | NM | NM                                              |
| <i>Gadus morhua</i> (Heart fibre, 5 °C) Subpolar<br>Leo et al., 2017                              | 21.4 °C (CT <sub>max</sub> , T <sub>acclimation</sub> = 8 °C)<br>Norin et al., 2019     | <b>12 °C</b> (plateau-CI, CII) | ND (coupling efficiency-CI, CII) <sup>see</sup><br>Gnaiger et al., 2015 | NM                                              | NM | NM                                              |
| <i>Gobionotothen gibberifrons</i> (Heart mito., 0 °C) Polar<br>Urschel and O'Brien, 2009          | 15.4 °C (CT <sub>max</sub> , T <sub>acclimation</sub> = 0 °C)<br>Beers and Sidell, 2011 | <b>31.4 °C</b> (ABT-CI)        | <b>26 °C</b> (RCR-CI)                                                   | NM                                              | NM | NM                                              |

|                                                                                              |                                                                                                      |                                |                                       |                    |         |                                   |
|----------------------------------------------------------------------------------------------|------------------------------------------------------------------------------------------------------|--------------------------------|---------------------------------------|--------------------|---------|-----------------------------------|
| <i>Haliotis corrugata</i> (Hepatopancreas, 20 °C) Mediterranean<br>Dahlhoff and Somero, 1993 | 32.0 °C (CT <sub>max</sub> , T <sub>acclimation</sub> = 19 °C) Diaz et al., 2006                     | <b>44.1 °C</b> (ABT-CII)       | NM                                    | NM                 | NM      | NM                                |
| <i>Haliotis fulgens</i> (Hepatopancreas, 20 °C) Mediterranean<br>Dahlhoff and Somero, 1993   | 33.6 °C (CT <sub>max</sub> , T <sub>acclimation</sub> = 19 °C) Diaz et al., 2006                     | <b>40.6 °C</b> (ABT-CII)       | NM                                    | NM                 | NM      | NM                                |
| <i>Haliotis rufescens</i> (Hepatopancreas, 12 °C) Mediterranean<br>Dahlhoff and Somero, 1993 | 27.5 °C (CT <sub>max</sub> , T <sub>acclimation</sub> = 17 °C) Diaz et al., 2000                     | <b>34.0 °C</b> (ABT-CII)       | NM                                    | NM                 | NM      | NM                                |
| <i>Lepidonotothen nudifrons</i> (Liver mito., 0 °C) Polar<br>Hardewig et al., 1999           | 8 to 11 °C (T <sub>lethal</sub> ), 15.06 °C (CT <sub>max</sub> )<br>Bilyk and DeVries, 2011          | ND (18°C-CI)                   | <b>9 °C</b> (RCR-CI), ND (P/O-CII)    | NM                 | NM      | NM                                |
| <i>Manduca sexta</i> (Whole animal mito., 27 °C) Tropical<br>Martinez et al., 2017           | 44.7 °C (CT <sub>max</sub> , T <sub>acclimation</sub> = 28 °C) Kingsolver et al., 2016               | <b>34 °C</b> (plateau-CI, CII) | <b>34 °C</b> (RCR-CI, CII)            | NM                 | NM      | NM                                |
| <i>Mya arenaria</i> (Mantle mito., 10 °C) Temperate<br>Abele et al., 2002                    | 31.3 °C (T <sub>lethal</sub> , T <sub>acclimation</sub> = 10 °C) Compton et al., 2007                | <b>15 °C</b> (ABT)             | ND (RCR), 15 °C (P/O)                 | NM                 | NM      | 15 °C (State IV-CI, State III-CI) |
| <i>Notolabrus celidotus</i> (Heart fibre, 18 °C) Temperate<br>Iftikar and Hickey, 2013       | 27.5 °C (T <sub>heart failure</sub> )                                                                | ND (32.5 °C-CI)                | 25 °C (RCR-CI), 27.5 °C (P/O-CI, CII) | NM                 | 27.5 °C | 32.5 °C (State III-CI)            |
| <i>Notothenia coriiceps</i> (Liver mito. 1 °C) Polar<br>Mark et al., 2012                    | 16.17 °C (CT <sub>max</sub> , T <sub>acclimation</sub> = -1.5 °C) Bilyk and DeVries, 2011            | <b>9 °C</b> (ABT-CI)           | ND (RCR-CI)                           | 6 °C (State II-CI) | NM      | NM                                |
| <i>Notothenia rossii</i> (Liver mito. 1 °C) Polar<br>Mark et al., 2012                       | 16.16 °C (CT <sub>max</sub> , T <sub>acclimation</sub> = -1.5 °C) Bilyk and DeVries, 2011            | <b>6 °C</b> (ABT-CI)           | ND (RCR-CI)                           | 9 °C (State II-CI) | NM      | NM                                |
| <i>Oreochromis mossambicus</i> (Liver mito., 28 °C) Tropical<br>Weinstein and Somero, 1998   | 42.22 °C (CT <sub>max</sub> )<br>King and Sardella, 2017                                             | <b>43.5 °C</b> (ABT-CI, CII)   | <b>35 °C</b> (ACR-CI, CII)            | NM                 | NM      | NM                                |
| <i>Pachycara brachycephalum</i> (Liver mito., 5 °C) Polar<br>Lannig et al., 2005             | 17.15 °C (CT <sub>max</sub> , T <sub>acclimation</sub> = 4 °C)<br>Bilyk and DeVries, 2011            | ND (20 °C)                     | 20 °C (RCR)                           | NM                 | NM      | NM                                |
| <i>Pachycara brachycephalum</i> (Liver, 0 °C) Polar<br>Lannig et al., 2005                   | 14.54 °C (CT <sub>max</sub> )<br>Bilyk and DeVries, 2011                                             | ND (20 °C)                     | <b>20 °C</b> (RCR)                    | NM                 | NM      | NM                                |
| <i>Romaleon antennarius</i> (Hepatopancreas, wild-caught) Temperate<br>Dahlhoff et al., 1991 | 31.5 °C (CT <sub>max</sub> , T <sub>acclimation</sub> = 15 °C) Padilla-Ramírez et al., 2015          | <b>31.0 °C</b> (ABT-CII)       | NM                                    | NM                 | NM      | NM                                |
| <i>Salvelinus alpinus</i> (Heart mito., 10 °C) Polar<br>Christen et al., 2018                | 23 °C (CT <sub>max</sub> )                                                                           | <b>15 °C</b> (plateau)         | NM                                    | NM                 | NM      | 25 °C (State III-CI, CII)         |
| <i>Sebastes mystinus</i> (Liver mito., 13 °C) Mediterranean<br>Weinstein and Somero, 1998    | 22.5 °C (T <sub>lethal</sub> , T <sub>acclimation</sub> = 12 °C) TENERA Environmental Services, 1988 | <b>39.5 °C</b> (ABT-CI, CII)   | <b>20 °C</b> (ACR-CI, CII)            | NM                 | NM      | NM                                |
| <i>Trematomus bernachchii</i> (Liver mito., -1.86 °C) Polar<br>Weinstein and Somero, 1998    | 13.62 °C (CT <sub>max</sub> )<br>Bilyk and DeVries, 2011                                             | <b>20.3 °C</b> (ABT-CI, CII)   | <b>18 °C</b> (ACR-CI, CII)            | NM                 | NM      | NM                                |

*Trematomus bernachchii*  
(Liver mito., 4 °C) Polar  
Weinstein and Somero, 1998

15.02 °C (CT<sub>max</sub>)  
Bilyk and DeVries, 2011

22.3 °C (ABT-  
CI, CII)

18 °C (ACR-CI, CII)

NM

NM

NM

ND: No clear acute temperature breakpoint detected, NM: Not measured, ABT: Arrhenius breakpoint temperature, plateau: no increase in function with increasing acute temperature, CI or CII following a mitochondrial parameter indicates the ETS complex being provided substrate, T<sub>decline</sub> – Acute temperature where a decline in mitochondrial function is observed, a range of acute temperatures is provided in instances where the exact T<sub>decline</sub> is ambiguous. Bold and underlined mitochondrial parameters are data that met the criteria for inclusion in Figure 2 – see section “Do mitochondria set organismal thermal limits?”.

- Abele, D., Heise, K., Pörtner, H. O. and Puntarulo, S.** (2002). Temperature-dependence of mitochondrial function and production of reactive oxygen species in the intertidal mud clam *Mya arenaria*. *J. Exp. Biol.* **205**, 1831–41.
- Beers, J. M. and Sidell, B. D.** (2011). Thermal tolerance of antarctic notothenioid fishes correlates with level of circulating hemoglobin. *Physiol. Biochem. Zool.* **84**, 353–362.
- Bilyk, K. T. and DeVries, A. L.** (2011). Heat tolerance and its plasticity in Antarctic fishes. *Comp. Biochem. Physiol. Part A Mol. Integr. Physiol.* **158**, 382–390.
- Chen, Z., Snow, M., Lawrence, C. S., Church, A. R., Narum, S. R., Devlin, R. H. and Farrell, A. P.** (2015). Selection for upper thermal tolerance in rainbow trout (*Oncorhynchus mykiss* Walbaum). *J. Exp. Biol.* **218**, 803–812.
- Childress, J., Mickel, T. J. and Childress', J. J.** (1982). Effects of pressure and temperature on the ekg and heart rate of the hydrothermal vent crab *Bythograea thermydron* (Brachyura). *Ref. Biol Bull* **162**,.
- Christen, F., Desrosiers, V., Dupont-Cyr, B. A., Vandenberg, G. W., Le François, N. R., Tardif, J. C., Dufresne, F., Lamarre, S. G. and Blier, P. U.** (2018). Thermal tolerance and thermal sensitivity of heart mitochondria: Mitochondrial integrity and ROS production. *Free Radic. Biol. Med.* **116**, 11–18.
- Chung, D. J. and Schulte, P. M.** (2015). Mechanisms and costs of mitochondrial thermal acclimation in a eurythermal killifish (*Fundulus heteroclitus*). *J. Exp. Biol.* **218**, 1621–1631.
- Chung, D. J., Bryant, H. J. and Schulte, P. M.** (2017). Thermal acclimation and subspecies-specific effects on heart and brain mitochondrial performance in a eurythermal teleost (*Fundulus heteroclitus*). *J. Exp. Biol.* **220**, 1459–1471.
- Chung, D. J., Sparagna, G. C., Chicco, A. J. and Schulte, P. M.** (2018). Patterns of mitochondrial membrane remodeling parallel functional adaptations to thermal stress. *J. Exp. Biol.* **221**, jeb174458.
- Compton, T. J., Rijkenberg, M. J. A., Drent, J. and Piersma, T.** (2007). Thermal tolerance ranges and climate variability: A comparison between bivalves from differing climates. *J. Exp. Mar. Bio. Ecol.*
- Dahlhoff, E. and Somero, G. N.** (1993). Effects of temperature on mitochondria from abalone (genus *Haliotis*): adaptive plasticity and its limits. *J. exp. Biol* **185**, 151–168.
- Dahlhoff, E., O'Brien, J., Somero, G. N. and Vetter, R. D.** (1991). Temperature effects on mitochondria from hydrothermal vent invertebrates: evidence for adaptation to elevated and variable habitat temperatures. *Physiol. Zool.* **64**, 1490–1508.
- Diaz, F., Re, A. D., Medina, Z., Re, G., Valdez, G. and Valenzuela, F.** (2006). Thermal preference and tolerance of green abalone *Haliotis fulgens* (Philippi, 1845) and pink abalone *Haliotis corrugata* (Gray, 1828). *Aquac. Res.* **37**, 877–884.
- Díaz, F., del Río-Portilla, M. A., Sierra, E., Aguilar, M. and Re-Araujo, A. D.** (2000). Preferred temperature and critical thermal maxima of red abalone *Haliotis rufescens*. *J. Therm. Biol.* **25**, 257–261.

- Drost, H. E., Lo, M., Carmack, E. C. and Farrell, A. P.** (2016). Acclimation potential of Arctic cod (*Boreogadus saida*) from the rapidly warming Arctic Ocean. *J. Exp. Biol.* **219**, 3114–3125.
- Fangue, N. A., Hofmeister, M. and Schulte, P. M.** (2006). Intraspecific variation in thermal tolerance and heat shock protein gene expression in common killifish, *Fundulus heteroclitus*. *J. Exp. Biol.* **209**, 2859–72.
- Fangue, N. A., Richards, J. G. and Schulte, P. M.** (2009). Do mitochondrial properties explain intraspecific variation in thermal tolerance? *J. Exp. Biol.* **212**, 514–522.
- Gnaiger, E., Boushel, R., Søndergaard, H., Munch-Andersen, T., Damsgaard, R., Hagen, C., Díez-Sánchez, C., Ara, I., Wright-Paradis, C., Schrauwen, P., et al.** (2015). Mitochondrial coupling and capacity of oxidative phosphorylation in skeletal muscle of Inuit and Caucasians in the arctic winter. *Scand. J. Med. Sci. Sports* **25**, 126–134.
- Hardewig, I., Peck, L. S. and Pörtner, H. O.** (1999). Thermal sensitivity of mitochondrial function in the Antarctic Notothenioid *Lepidonotothen nudifrons*. *J. Comp. Physiol. - B Biochem. Syst. Environ. Physiol.* **169**, 597–604.
- Iftikar, F. I. and Hickey, A. J. R.** (2013). Do mitochondria limit hot fish hearts? Understanding the role of mitochondrial function with heat stress in *Notolabrus celidotus*. *PLoS One* **8**,.
- King, M. and Sardella, B.** (2017). The effects of acclimation temperature, salinity, and behavior on the thermal tolerance of Mozambique tilapia (*Oreochromis mossambicus*). *J. Exp. Zool. Part A Ecol. Integr. Physiol.* **327**, 417–422.
- Kingsolver, J. G., MacLean, H. J., Goddin, S. B. and Augustine, K. E.** (2016). Plasticity of upper thermal limits to acute and chronic temperature variation in *Manduca sexta* larvae. *J. Exp. Biol.* **219**, 1290–1294.
- Lannig, G., Storch, D. and Pörtner, H.-O. O.** (2005). Aerobic mitochondrial capacities in Antarctic and temperate eelpout (*Zoarcidae*) subjected to warm versus cold acclimation. *Polar Biol.* **28**, 575–584.
- Leo, E., Kunz, K. L., Schmidt, M., Storch, D., Pörtner, H. O. and Mark, F. C.** (2017). Mitochondrial acclimation potential to ocean acidification and warming of Polar cod (*Boreogadus saida*) and Atlantic cod (*Gadus morhua*). *Front. Zool.* **14**, 21.
- Mark, F. C., Lucassen, M., Strobel, A., Barrera-Oro, E., Koschnick, N., Zane, L., Patarnello, T., Pörtner, H. O. and Papetti, C.** (2012). Mitochondrial function in antarctic nototheniids with ND6 translocation. *PLoS One* **7**,.
- Martinez, E., Menze, M. A. and Agosta, S. J.** (2017). Reduced mitochondrial efficiency explains mismatched growth and metabolic rate at supraoptimal temperatures. *Physiol. Biochem. Zool.* **90**, 294–298.
- Norin, T., Canada, P., Bailey, J. A. and Gamperl, A. K.** (2019). Thermal biology and swimming performance of Atlantic cod (*Gadus morhua*) and haddock (*Melanogrammus aeglefinus*). *PeerJ* **7**, e7784.
- Overgaard, J., Kristensen, T. N., Mitchell, K. A. and Hoffmann, A. A.** (2011). Thermal

tolerance in widespread and tropical *Drosophila* species: does phenotypic plasticity increase with latitude? *Am. Nat.* **178**, S80–S96.

- Padilla-Ramírez, S., Díaz, F., Re, A. D., Galindo-Sanchez, C. E., Sanchez-Lizarraga, A. L., Nuñez-Moreno, L. A., Moreno-Sierra, D., Paschke, K. and Rosas, C.** (2015). The effects of thermal acclimation on the behavior, thermal tolerance, and respiratory metabolism in a crab inhabiting a wide range of thermal habitats ( *Cancer antennarius* Stimpson, 1856, the red shore crab). *Mar. Freshw. Behav. Physiol.* **48**, 89–101.
- Pichaud, N., Chatelain, E. H., Ballard, J. W. O., Tanguay, R., Morrow, G. and Blier, P. U.** (2010). Thermal sensitivity of mitochondrial metabolism in two distinct mitotypes of *Drosophila simulans*: evaluation of mitochondrial plasticity. *J. Exp. Biol.* **213**, 1665–1675.
- Ravaux, J., Hamel, G., Zbinden, M., Tasiemski, A. A., Boutet, I., Léger, N., Tanguy, A., Jollivet, D. and Shillito, B.** (2013). Thermal limit for metazoan life in question: in vivo heat tolerance of the pompeii worm. *PLoS One* **8**, e64074.
- St-Pierre, J., Charest, P. M. and Guderley, H.** (1998). Relative contribution of quantitative and qualitative changes in mitochondria to metabolic compensation during seasonal acclimatisation of rainbow trout *Oncorhynchus mykiss*. *J. Exp. Biol.* **201**, 2961–2970.
- TENERA Environemtnal Services** (1988). *Pacific Gas and Electric Company Diablo Canyon Power Plant Final Report Thermal Effects Monitoring Program Volume 1*. Berkeley.
- Urschel, M. R. and O'Brien, K. M.** (2009). Mitochondrial function in Antarctic notothenioid fishes that differ in the expression of oxygen-binding proteins. *Polar Biol.* **32**, 1323–1330.
- Weinstein, R. B. and Somero, G. N.** (1998). Effects of temperature on mitochondrial function in the Antarctic fish *Trematomus bernacchii*. *J. Comp. Physiol. - B Biochem. Syst. Environ. Physiol.* **168**, 190–196.
